# Supplementary material
Source: PubMed Central journal article supplement (PMC7685549)
Supplement: JB.00261-20-s0001.pdf [file JB.00261-20-s0001.pdf]

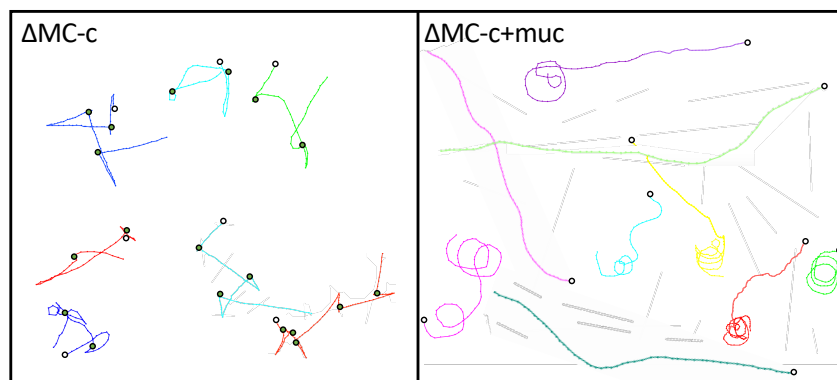

**Figure S1. Motility behavior of the complemented  $\Delta$ MC strain in the presence of mucin.** 2D traces of complemented  $\Delta$ MC cells were captured by dark-field microscopy of bacterial motility in M9 media without or with 2% mucin. Different single-cell trajectories in x and y are indicated by different colors. Open circles denote the start position for each trace and green circles indicate flicks. Traces from a single representative experiment are shown.

**Table S1. Primers used in this study**

| Primer                        | Purpose                                                                                                    | Sequence                                                     |
|-------------------------------|------------------------------------------------------------------------------------------------------------|--------------------------------------------------------------|
| <i>EclacZ</i> -F              | Amplify <i>E. coli lacZ</i>                                                                                | ATGACCATGATTACGGATTAC                                        |
| <i>EclacZ</i> -R              |                                                                                                            | GCCGGCGCCGCTCTAGTTATTTTTGACACCAGACCAAC                       |
| <i>VchΔP<sub>lacZ</sub>-1</i> | Delete promoter of chromosomal <i>V. cholerae lacZ</i>                                                     | GTACCGGGTTGAGAAGCGGTGTAAGTGAAGTGCATCATC<br>TCTGGTGTGAGCAC    |
| <i>VchΔP<sub>lacZ</sub>-2</i> |                                                                                                            | AAATAGAGGTGATATTGACC                                         |
| <i>VchΔP<sub>lacZ</sub>-3</i> |                                                                                                            | GGTCAATATCGACCTCTATTCGCAACTTCTCCGATATTCT<br>TC               |
| <i>VchΔP<sub>lacZ</sub>-4</i> |                                                                                                            | TTGCTACGCCTGAATAAGTGATAGGGCCCGATCCCCTGA<br>GTGATTTCTACTTTGCG |
| <i>VchΔvipA-1</i>             | Construct the <i>V. cholerae ΔMC</i> mutant                                                                | CGCTTATGAGCTCGCGCTG                                          |
| <i>VchΔvipA-TpK7-2</i>        |                                                                                                            | GTCGACGGATCCCCGGAATCATATTACGTCTCCAATACCT<br>AT               |
| <i>VchΔhsiF-TpK7-3</i>        |                                                                                                            | GAAGCAGCTCCAGCCTACATAACCTCTATGACGCAAGAC<br>AA                |
| <i>VchΔhsiF-4</i>             |                                                                                                            | GTATCTTGCCAACCAACCACT                                        |
| <i>VchvipA-hsiF-F</i>         | Amplify <i>vipA-hsiF</i> region with native promoter for cloning into pSW23T- <i>lacZ</i> <sup>Vc400</sup> | GCCATGTATCAGTGACGAAACAACAACACTCTGTGACA<br>TGCC               |
| <i>VchvipA-hsiF-R</i>         |                                                                                                            | GACGCGATGGGTGCGCTGTTAAAACACTCGATATTTTCT<br>G                 |
| <i>VchP<sub>vipA</sub>-F</i>  | Amplify the <i>V. cholerae vipA</i> promoter for <i>lacZ</i> reporter construction                         | GACTCACTATAGGGCGAATTGCAACAACACTCTGTGACAT<br>GGC              |
| <i>VchP<sub>vipA</sub>-R</i>  |                                                                                                            | GTGAATCCGTAATTTGGGAGCTACACTTCCTTC                            |
| <i>TmR-F</i>                  | Amplify the <i>Tm</i> resistance cassette                                                                  | ATCCGGGGATCCGTCGAC                                           |
| <i>TmR-R</i>                  |                                                                                                            | TGTAGGCTGGAGCTGCTTC                                          |
| <i>VchΔcheY3-1</i>            | Construct the <i>V. cholerae ΔcheY3</i> mutant                                                             | ATTAACATTAGTGACAGAACGG                                       |
| <i>VchΔcheY3-TpK7-2</i>       |                                                                                                            | GTCGACGGATCCCCGGAATTGCCTCCACTGAGTTTGAGAT<br>C                |
| <i>VchΔcheY3-TpK73</i>        |                                                                                                            | GAAGCAGCTCCAGCCTACATTATAAACGCTCAAAAATTTT<br>GTC              |
| <i>VchΔcheY3-4</i>            |                                                                                                            | CCATTTGTAATAATGTGGAACAC                                      |
| <i>VchcheY3-F</i>             | Amplify <i>cheY3</i> fused to <i>P<sub>tac</sub></i> for cloning into pSW23T- <i>lacZ</i> <sup>Vc400</sup> | GACTCACTATAGGGCGAATTGGAGGCAATTTTGAATAAA<br>AACATG            |
| <i>VchcheY3-R</i>             |                                                                                                            | GCCGGCGCCGCTCTAGTTATAAACGCTCAAAAATTTTGT<br>C                 |

**Table S2. Plasmid used in this study**

| Plasmid                                                                         | Purpose                                                                                                                                | Source    |
|---------------------------------------------------------------------------------|----------------------------------------------------------------------------------------------------------------------------------------|-----------|
| pNKTXI-Scel                                                                     | mini <i>Tn10</i> transposon mutagenesis plasmid                                                                                        | (3)       |
| pMMB-TfoX                                                                       | Allelic replacement of target <i>V. cholerae</i> genes by MuGENT                                                                       | (4)       |
| pRE112                                                                          | Conditionally replicating plasmid for generating markerless deletions; <i>cat</i> , <i>sacB1</i> , <i>RP4oriT</i> , <i>R6Kgori pir</i> | (1)       |
| pRE112- $\Delta P_{lacZ}^{Vch}$                                                 | Markerless deletion of the chromosomal <i>lacZ</i> <sup>Vch</sup> promoter                                                             | This work |
| pSW23T                                                                          | Conditionally replicating plasmid; <i>cat</i> , <i>RP4oriT</i> , <i>R6Kgori pir</i>                                                    | (2)       |
| pSW23T- <i>lacZ</i> <sup>Vc400</sup>                                            | Integration into the chromosomal <i>lacZ</i>                                                                                           | This work |
| pSW23T- <i>lacZ</i> <sup>Vc400</sup> - <i>P<sub>vipA</sub>lacZ<sup>Ec</sup></i> | Reporter plasmid for <i>P<sub>vipA</sub></i> expression                                                                                | This work |
| pSW23T- <i>lacZ</i> <sup>Vc400</sup> - <i>vipA-hsiF</i>                         | Complementation of $\Delta$ MC                                                                                                         | This work |

## References

1. **Shames SR, Bhavsar AP, Croxen MA, Law RJ, Mak SHC, Deng W, Li Y, Bidshari R, de Hoog CL, Foster LJ, Finlay BB.** 2011. The pathogenic Escherichia coli type III secreted protease NleC degrades the host acetyltransferase p300. *Cellular Microbiology* **13**:1542–1557.
2. **Demarre G, Guérout A-M, Matsumoto-Mashimo C, Rowe-Magnus DA, Marlière P, Mazel D.** 2005. A new family of mobilizable suicide plasmids based on broad host range R388 plasmid (IncW) and RP4 plasmid (IncPalph) conjugative machineries and their cognate Escherichia coli host strains. *Res Microbiol* **156**:245–255.
3. **Nakhamchik A, Wilde C, Rowe-Magnus DA.** 2007. Identification of a Wzy polymerase required for group IV capsular polysaccharide and lipopolysaccharide biosynthesis in *Vibrio vulnificus*. *Infect Immun* **75**:5550–5558.
4. **Dalia AB, McDonough E, Camilli A.** 2014. Multiplex genome editing by natural transformation. *Proceedings of the National Academy of Sciences* **111**:8937–8942.
